# Supplementary material for: Automated Microbial Library Generation Using the Bioinformatics Platform IDBac
Source: MDPI journal article supplement (doi:10.3390/molecules27072038), 2022-03-22
Supplement: s1 [file s1]

# Automated Microbial Library Generation Using the Bioinformatics Platform IDBac

Chase M. Clark <sup>1</sup>, Linh Nguyen <sup>2</sup>, Van Cuong Pham <sup>2</sup>, Laura M. Sanchez <sup>3</sup> and Brian T. Murphy <sup>1,\*</sup>

<sup>1</sup> Department of Pharmaceutical Sciences, Center for Biomolecular Sciences, College of Pharmacy, University of Illinois at Chicago, 833 S. Wood St., Chicago, IL 60612, USA; cmclark8@uic.edu

<sup>2</sup> Institute of Marine Biochemistry, Vietnam Academy of Science and Technology, Nghiado, Cau Giay, Hanoi 10000, Vietnam; nguyenthuylinhrc@gmail.com (L.N.); phamvc@imbc.vast.vn (V.C.P.)

<sup>3</sup> Department of Chemistry and Biochemistry, University of California Santa Cruz, 1156 High Street, Santa Cruz, CA 95064, USA; lmsanche@ucsc.edu

\* Correspondence: btmurphy@uic.edu; Tel.: +1-(312)-413-9057

| Ingredients                                       | SWA  | NZSG | A1   | M1   | ISP2 | SCA  | PDA  | ISP1 |
|---------------------------------------------------|------|------|------|------|------|------|------|------|
| Malt Extract (g)                                  | 0    | 0    | 0    | 0    | 10   | 0    | 0    | 0    |
| Yeast Extract (g)                                 | 0    | 5    | 4    | 0.4  | 4    | 0    | 0    | 3    |
| Soluble Starch (g)                                | 0    | 20   | 10   | 1    | 0    | 10   | 5    | 0    |
| Glucose (g)                                       | 0    | 10   | 0    | 0    | 4    | 0    | 20   | 0    |
| 50% Glycerol (ml)                                 | 0    | 0    | 0    | 0    | 0    | 0    | 0    | 0    |
| N-Z Amine A (g)                                   | 0    | 5    | 0    | 0    | 0    | 0    | 0    | 0    |
| Casein (g)                                        | 0    | 0    | 0    | 0    | 0    | 0.3  | 0    | 0    |
| Calcium Carbonate (g)                             | 0    | 3    | 0    | 0    | 0    | 0    | 0    | 0    |
| Casamino acids (g)                                | 0    | 0    | 0    | 0    | 0    | 0    | 0    | 0    |
| Casitone (g)                                      | 0    | 0    | 0    | 0    | 0    | 0    | 0    | 5    |
| Potato extract (g)                                | 0    | 0    | 0    | 0    | 0    | 0    | 30   | 0    |
| Peptone (g)                                       | 0    | 0    | 1    | 0.2  | 0    | 0    | 0    | 0    |
| Soytone (g)                                       | 0    | 0    | 0    | 0    | 0    | 0    | 0    | 0    |
| Tryptone (g)                                      | 0    | 0    | 0    | 0    | 0    | 0    | 0    | 0    |
| NaCl (g)                                          | 0    | 0    | 0    | 0    | 0    | 0    | 0    | 0    |
| CaCO <sub>3</sub> (g)                             | 0    | 3    | 0    | 0    | 0    | 0.02 | 0    | 0    |
| K <sub>2</sub> HPO <sub>4</sub> (g)               | 0    | 0    | 0    | 0    | 0    | 2    | 0    | 0    |
| KH <sub>2</sub> PO <sub>4</sub> (g)               | 0    | 0    | 0    | 0    | 0    | 0    | 0    | 0    |
| KNO <sub>3</sub> (g)                              | 0    | 0    | 0    | 0    | 0    | 2    | 0    | 0    |
| MgSO <sub>4</sub> ·7H <sub>2</sub> O (g)          | 0    | 0    | 0    | 0    | 0    | 0.05 | 0    | 0    |
| 8 mg/mL FeSO <sub>4</sub> ·7H <sub>2</sub> O (ml) | 0    | 0    | 0    | 0    | 0    | 0    | 0    | 0    |
| Agar (g)                                          | 15   | 15   | 15   | 15   | 15   | 15   | 15   | 15   |
| Instant Ocean (g)                                 | 30   | 30   | 30   | 30   | 30   | 30   | 30   | 30   |
| Filtered Lake Water (ml)                          | 1000 | 1000 | 1000 | 1000 | 1000 | 1000 | 1000 | 1000 |

**Table S1.** Media formulations used in this study.
